# Supplementary material
Source: PubMed Central journal article supplement (PMC8497436)
Supplement: NIHMS1742417-supplement-supplementary_material.pdf [file NIHMS1742417-supplement-supplementary_material.pdf]

*Supporting information*

**Structural and Electronic Analysis of the  
Octarepeat Region of Prion Protein with Four Cu<sup>2+</sup>  
by Polarizable MD and QM/MM Simulations**

Jorge Nochebuena<sup>1</sup>, Liliana Quintanar<sup>2</sup>, Alberto Vela<sup>2</sup>, and G. Andrés Cisneros<sup>1</sup>

<sup>1</sup>Department of Chemistry, University of North Texas, Denton, Texas, 76201, USA

<sup>2</sup>Centro de Investigación y de Estudios Avanzados del IPN, Mexico City, 07360,  
Mexico

August 30, 2021

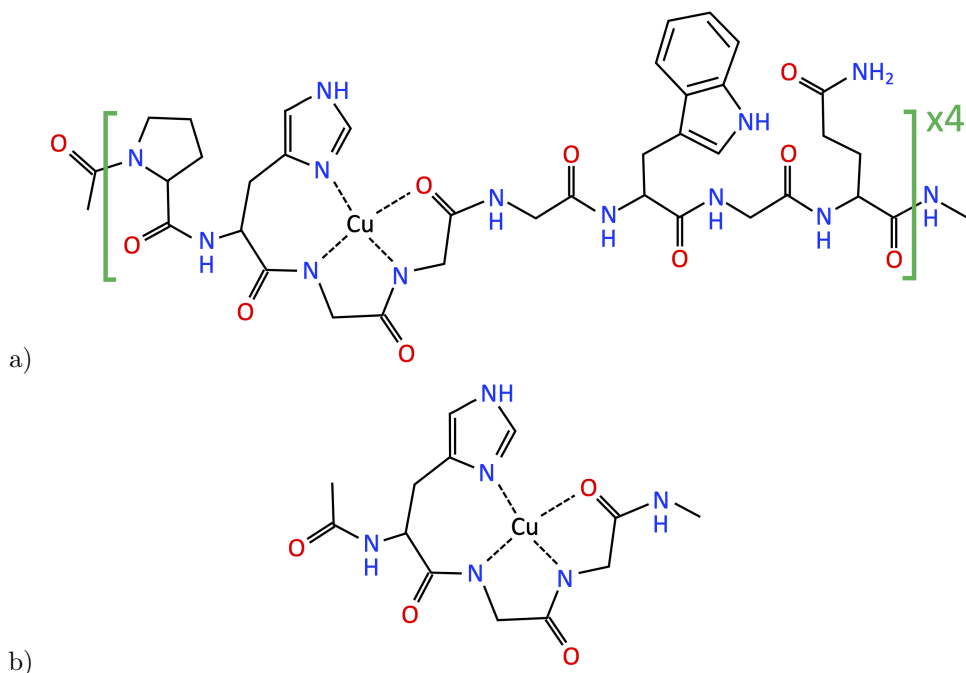

Figure S1: Two-dimensional representation of a) octarepeat region and b) HGG peptide used for the parametrization. Note that the N-terminal and C-terminal regions are capped with acetyl and N-methylacetamide, respectively.

Table S1: Mulliken charges and spin densities for model 1.

| No. | Residue | Atom | Mulliken charges | Spin densities | No. | Residue | Atom | Mulliken charges | Spin densities |
|-----|---------|------|------------------|----------------|-----|---------|------|------------------|----------------|
| 1   | 1ACE    | C    | -0.090405        | 0.000059       | 205 | 18PRO   | C    | 0.245402         | 0.000024       |
| 2   | 1ACE    | C    | 0.185398         | -0.000005      | 206 | 18PRO   | O    | -0.344492        | 0.000059       |
| 3   | 1ACE    | O    | -0.430793        | 0.000017       | 207 | 18PRO   | H    | 0.059897         | 0.000000       |
| 4   | 1ACE    | H    | 0.090082         | -0.000001      | 208 | 18PRO   | C    | -0.098483        | -0.000037      |
| 5   | 1ACE    | H    | 0.082912         | -0.000002      | 209 | 18PRO   | C    | -0.076580        | -0.000028      |
| 6   | 1ACE    | H    | 0.072099         | 0.000011       | 210 | 18PRO   | C    | 0.077565         | 0.000004       |
| 7   | 2PRO    | N    | -0.338730        | 0.000012       | 211 | 18PRO   | H    | 0.051405         | -0.000001      |
| 8   | 2PRO    | C    | -0.085359        | -0.000003      | 212 | 18PRO   | H    | 0.135302         | 0.000010       |
| 9   | 2PRO    | C    | 0.209320         | -0.000040      | 213 | 18PRO   | H    | 0.092680         | -0.000021      |
| 10  | 2PRO    | O    | -0.355675        | 0.000059       | 214 | 18PRO   | H    | 0.052035         | 0.000019       |
| 11  | 2PRO    | H    | 0.084538         | 0.000006       | 215 | 18PRO   | H    | 0.104720         | -0.000001      |
| 12  | 2PRO    | C    | 0.048804         | 0.000010       | 216 | 18PRO   | H    | 0.011396         | -0.000004      |
| 13  | 2PRO    | C    | -0.125742        | -0.000001      | 217 | 19HIE   | N    | -0.205647        | 0.000119       |
| 14  | 2PRO    | C    | 0.081354         | -0.000001      | 218 | 19HIE   | C    | 0.050547         | 0.000712       |
| 15  | 2PRO    | H    | 0.042326         | 0.000001       | 219 | 19HIE   | C    | 0.187422         | -0.001985      |
| 16  | 2PRO    | H    | 0.067950         | 0.000000       | 220 | 19HIE   | O    | -0.402935        | 0.008316       |
| 17  | 2PRO    | H    | 0.059608         | 0.000000       | 221 | 19HIE   | H    | 0.173466         | 0.000075       |
| 18  | 2PRO    | H    | 0.043506         | -0.000001      | 222 | 19HIE   | H    | 0.020192         | -0.000193      |
| 19  | 2PRO    | H    | 0.118416         | 0.000000       | 223 | 19HIE   | C    | 0.021327         | 0.000279       |
| 20  | 2PRO    | H    | 0.107839         | 0.000001       | 224 | 19HIE   | C    | -0.064037        | -0.002492      |
| 21  | 3HIE    | N    | -0.194527        | 0.000283       | 225 | 19HIE   | N    | -0.309132        | 0.039607       |

Table S1: Mulliken charges and spin densities for model 1.

| No. | Residue | Atom | Mulliken charges | Spin densities | No. | Residue | Atom | Mulliken charges | Spin densities |
|-----|---------|------|------------------|----------------|-----|---------|------|------------------|----------------|
| 22  | 3HIE    | C    | 0.056505         | 0.000199       | 226 | 19HIE   | C    | 0.019322         | 0.001403       |
| 23  | 3HIE    | C    | 0.192037         | 0.001800       | 227 | 19HIE   | C    | 0.206039         | -0.002379      |
| 24  | 3HIE    | O    | -0.485847        | 0.020335       | 228 | 19HIE   | N    | -0.164414        | 0.001048       |
| 25  | 3HIE    | H    | 0.159593         | -0.000008      | 229 | 19HIE   | H    | 0.030503         | -0.000032      |
| 26  | 3HIE    | H    | 0.063206         | -0.000258      | 230 | 19HIE   | H    | 0.096575         | -0.000225      |
| 27  | 3HIE    | C    | 0.118717         | 0.000636       | 231 | 19HIE   | H    | 0.079871         | 0.000067       |
| 28  | 3HIE    | C    | -0.078914        | -0.001828      | 232 | 19HIE   | H    | 0.077544         | 0.000749       |
| 29  | 3HIE    | N    | -0.334711        | 0.037893       | 233 | 19HIE   | H    | 0.221258         | 0.000565       |
| 30  | 3HIE    | C    | 0.045603         | 0.001205       | 234 | 20GLY   | N    | -0.400745        | 0.161738       |
| 31  | 3HIE    | C    | 0.197943         | -0.002247      | 235 | 20GLY   | C    | 0.170293         | -0.002964      |
| 32  | 3HIE    | N    | -0.195895        | 0.000795       | 236 | 20GLY   | C    | 0.129478         | -0.000233      |
| 33  | 3HIE    | H    | 0.038464         | -0.000011      | 237 | 20GLY   | O    | -0.342307        | 0.016256       |
| 34  | 3HIE    | H    | 0.075090         | -0.000352      | 238 | 20GLY   | H    | 0.029653         | 0.001005       |
| 35  | 3HIE    | H    | 0.042982         | 0.000105       | 239 | 20GLY   | H    | 0.003441         | 0.002077       |
| 36  | 3HIE    | H    | 0.084136         | 0.000780       | 240 | 21GLY   | N    | -0.446985        | 0.121023       |
| 37  | 3HIE    | H    | 0.271529         | 0.000553       | 241 | 21GLY   | C    | 0.171844         | 0.001156       |
| 38  | 4GLY    | N    | -0.420030        | 0.134757       | 242 | 21GLY   | C    | 0.223702         | 0.003526       |
| 39  | 4GLY    | C    | 0.153078         | -0.000698      | 243 | 21GLY   | O    | -0.420272        | 0.023908       |
| 40  | 4GLY    | C    | 0.175172         | -0.004685      | 244 | 21GLY   | H    | 0.053872         | 0.004741       |
| 41  | 4GLY    | O    | -0.446785        | 0.004755       | 245 | 21GLY   | H    | 0.042780         | -0.000164      |
| 42  | 4GLY    | H    | 0.031475         | 0.000859       | 246 | 22GLY   | N    | -0.205350        | 0.001372       |
| 43  | 4GLY    | H    | 0.070409         | 0.000541       | 247 | 22GLY   | C    | 0.084025         | -0.000339      |
| 44  | 5GLY    | N    | -0.481573        | 0.131534       | 248 | 22GLY   | C    | 0.168738         | 0.000121       |
| 45  | 5GLY    | C    | 0.180882         | 0.001739       | 249 | 22GLY   | O    | -0.329043        | 0.000358       |
| 46  | 5GLY    | C    | 0.192603         | 0.001373       | 250 | 22GLY   | H    | 0.230466         | 0.000637       |
| 47  | 5GLY    | O    | -0.409904        | 0.020194       | 251 | 22GLY   | H    | 0.080693         | 0.000122       |
| 48  | 5GLY    | H    | 0.081850         | 0.000920       | 252 | 22GLY   | H    | 0.128611         | 0.000049       |
| 49  | 5GLY    | H    | 0.060097         | 0.006042       | 253 | 23TRP   | N    | -0.259253        | 0.000019       |
| 50  | 6GLY    | N    | -0.235667        | -0.000727      | 254 | 23TRP   | C    | 0.069173         | -0.000008      |
| 51  | 6GLY    | C    | 0.089580         | 0.000111       | 255 | 23TRP   | C    | 0.164026         | 0.000007       |
| 52  | 6GLY    | C    | 0.163960         | -0.000103      | 256 | 23TRP   | O    | -0.429998        | 0.000002       |
| 53  | 6GLY    | O    | -0.392488        | -0.000003      | 257 | 23TRP   | H    | 0.198863         | -0.000002      |
| 54  | 6GLY    | H    | 0.199597         | 0.000602       | 258 | 23TRP   | H    | 0.073108         | 0.000004       |
| 55  | 6GLY    | H    | 0.110517         | 0.000041       | 259 | 23TRP   | C    | 0.043030         | -0.000001      |
| 56  | 6GLY    | H    | 0.069251         | -0.000003      | 260 | 23TRP   | C    | -0.028876        | -0.000001      |
| 57  | 7TRP    | N    | -0.234328        | 0.000025       | 261 | 23TRP   | C    | -0.058655        | 0.000001       |
| 58  | 7TRP    | C    | 0.088386         | -0.000004      | 262 | 23TRP   | C    | 0.021792         | 0.000000       |
| 59  | 7TRP    | C    | 0.164887         | 0.000000       | 263 | 23TRP   | N    | -0.108531        | 0.000000       |
| 60  | 7TRP    | O    | -0.435503        | 0.000002       | 264 | 23TRP   | C    | 0.071709         | 0.000000       |
| 61  | 7TRP    | H    | 0.239492         | -0.000003      | 265 | 23TRP   | C    | -0.152307        | 0.000000       |
| 62  | 7TRP    | H    | 0.039264         | 0.000001       | 266 | 23TRP   | C    | -0.057840        | 0.000000       |
| 63  | 7TRP    | C    | 0.009691         | 0.000010       | 267 | 23TRP   | C    | -0.073056        | 0.000000       |
| 64  | 7TRP    | C    | -0.170369        | -0.000069      | 268 | 23TRP   | C    | -0.052128        | 0.000000       |
| 65  | 7TRP    | C    | 0.023918         | 0.000040       | 269 | 23TRP   | H    | 0.078689         | 0.000000       |
| 66  | 7TRP    | C    | 0.035585         | 0.000013       | 270 | 23TRP   | H    | 0.041575         | 0.000000       |
| 67  | 7TRP    | N    | -0.117969        | -0.000032      | 271 | 23TRP   | H    | 0.071273         | 0.000000       |
| 68  | 7TRP    | C    | 0.065211         | -0.000139      | 272 | 23TRP   | H    | 0.169621         | 0.000000       |
| 69  | 7TRP    | C    | -0.109024        | -0.000006      | 273 | 23TRP   | H    | 0.014528         | 0.000000       |

Table S1: Mulliken charges and spin densities for model 1.

| No. | Residue | Atom | Mulliken charges | Spin densities | No. | Residue | Atom | Mulliken charges | Spin densities |
|-----|---------|------|------------------|----------------|-----|---------|------|------------------|----------------|
| 70  | 7TRP    | C    | -0.088888        | 0.000166       | 274 | 23TRP   | H    | 0.024613         | 0.000000       |
| 71  | 7TRP    | C    | -0.024796        | -0.000005      | 275 | 23TRP   | H    | 0.057847         | 0.000000       |
| 72  | 7TRP    | C    | -0.067769        | 0.000025       | 276 | 23TRP   | H    | 0.065357         | 0.000000       |
| 73  | 7TRP    | H    | 0.072757         | 0.000015       | 277 | 24GLY   | N    | -0.234194        | 0.000002       |
| 74  | 7TRP    | H    | 0.049188         | -0.000012      | 278 | 24GLY   | C    | 0.102118         | 0.000000       |
| 75  | 7TRP    | H    | 0.072636         | 0.000011       | 279 | 24GLY   | C    | 0.152735         | 0.000000       |
| 76  | 7TRP    | H    | 0.168568         | -0.000013      | 280 | 24GLY   | O    | -0.420912        | 0.000000       |
| 77  | 7TRP    | H    | 0.039413         | 0.000001       | 281 | 24GLY   | H    | 0.228736         | 0.000000       |
| 78  | 7TRP    | H    | 0.013612         | 0.000009       | 282 | 24GLY   | H    | 0.098587         | 0.000000       |
| 79  | 7TRP    | H    | 0.042592         | 0.000001       | 283 | 24GLY   | H    | 0.097552         | 0.000000       |
| 80  | 7TRP    | H    | 0.024136         | -0.000002      | 284 | 25GLN   | N    | -0.210914        | 0.000003       |
| 81  | 8GLY    | N    | -0.160000        | -0.000001      | 285 | 25GLN   | C    | -0.012446        | 0.000001       |
| 82  | 8GLY    | C    | 0.140459         | 0.000000       | 286 | 25GLN   | C    | 0.247201         | -0.000012      |
| 83  | 8GLY    | C    | 0.147596         | 0.000000       | 287 | 25GLN   | O    | -0.335602        | 0.000036       |
| 84  | 8GLY    | O    | -0.336123        | 0.000000       | 288 | 25GLN   | H    | 0.165181         | 0.000000       |
| 85  | 8GLY    | H    | 0.176263         | 0.000000       | 289 | 25GLN   | H    | 0.095011         | 0.000000       |
| 86  | 8GLY    | H    | 0.075572         | 0.000000       | 290 | 25GLN   | C    | 0.074255         | -0.000001      |
| 87  | 8GLY    | H    | 0.095880         | 0.000000       | 291 | 25GLN   | C    | -0.113207        | 0.000023       |
| 88  | 9GLN    | N    | -0.228250        | -0.000001      | 292 | 25GLN   | C    | 0.058421         | -0.000001      |
| 89  | 9GLN    | C    | 0.045109         | 0.000000       | 293 | 25GLN   | O    | -0.402561        | 0.000000       |
| 90  | 9GLN    | C    | 0.238046         | 0.000000       | 294 | 25GLN   | N    | -0.113102        | 0.000000       |
| 91  | 9GLN    | O    | -0.333931        | 0.000001       | 295 | 25GLN   | H    | 0.046999         | -0.000002      |
| 92  | 9GLN    | H    | 0.184044         | 0.000001       | 296 | 25GLN   | H    | 0.042970         | 0.000000       |
| 93  | 9GLN    | H    | 0.075873         | 0.000000       | 297 | 25GLN   | H    | 0.075594         | -0.000030      |
| 94  | 9GLN    | C    | -0.003542        | -0.000002      | 298 | 25GLN   | H    | 0.059084         | 0.000000       |
| 95  | 9GLN    | C    | -0.127913        | 0.000009       | 299 | 25GLN   | H    | 0.162053         | 0.000002       |
| 96  | 9GLN    | C    | 0.106101         | -0.000001      | 300 | 25GLN   | H    | 0.195619         | 0.000000       |
| 97  | 9GLN    | O    | -0.387083        | -0.000001      | 301 | 26PRO   | N    | -0.337757        | 0.000009       |
| 98  | 9GLN    | N    | -0.152813        | 0.000019       | 302 | 26PRO   | C    | 0.028024         | 0.000065       |
| 99  | 9GLN    | H    | 0.007090         | 0.000002       | 303 | 26PRO   | C    | 0.153860         | -0.000236      |
| 100 | 9GLN    | H    | 0.060085         | 0.000000       | 304 | 26PRO   | O    | -0.350483        | 0.000032       |
| 101 | 9GLN    | H    | 0.092519         | 0.000001       | 305 | 26PRO   | H    | 0.077719         | -0.000008      |
| 102 | 9GLN    | H    | 0.080500         | -0.000005      | 306 | 26PRO   | C    | -0.048094        | 0.000008       |
| 103 | 9GLN    | H    | 0.205254         | 0.000003       | 307 | 26PRO   | C    | -0.055454        | -0.000003      |
| 104 | 9GLN    | H    | 0.166874         | -0.000001      | 308 | 26PRO   | C    | 0.097223         | -0.000001      |
| 105 | 10PRO   | N    | -0.381564        | 0.000000       | 309 | 26PRO   | H    | 0.070147         | -0.000006      |
| 106 | 10PRO   | C    | -0.018771        | 0.000059       | 310 | 26PRO   | H    | 0.031403         | 0.000001       |
| 107 | 10PRO   | C    | 0.185516         | -0.000135      | 311 | 26PRO   | H    | 0.061617         | 0.000000       |
| 108 | 10PRO   | O    | -0.304805        | 0.000072       | 312 | 26PRO   | H    | 0.061663         | -0.000035      |
| 109 | 10PRO   | H    | 0.075729         | -0.000002      | 313 | 26PRO   | H    | 0.060853         | 0.000001       |
| 110 | 10PRO   | C    | -0.021843        | -0.000009      | 314 | 26PRO   | H    | 0.070210         | 0.000001       |
| 111 | 10PRO   | C    | -0.047679        | -0.000002      | 315 | 27HIE   | N    | -0.133142        | 0.000658       |
| 112 | 10PRO   | C    | 0.103594         | 0.000002       | 316 | 27HIE   | C    | 0.035514         | 0.000649       |
| 113 | 10PRO   | H    | 0.052387         | 0.000000       | 317 | 27HIE   | C    | 0.183043         | -0.001818      |
| 114 | 10PRO   | H    | 0.092165         | 0.000001       | 318 | 27HIE   | O    | -0.456965        | 0.014543       |
| 115 | 10PRO   | H    | 0.071002         | 0.000000       | 319 | 27HIE   | H    | 0.154520         | 0.000057       |
| 116 | 10PRO   | H    | 0.040725         | -0.000001      | 320 | 27HIE   | H    | 0.069472         | 0.000127       |
| 117 | 10PRO   | H    | 0.067930         | 0.000000       | 321 | 27HIE   | C    | 0.069446         | -0.000346      |



Table S1: Mulliken charges and spin densities for model 1.

| No. | Residue | Atom | Mulliken charges | Spin densities | No. | Residue | Atom | Mulliken charges | Spin densities |
|-----|---------|------|------------------|----------------|-----|---------|------|------------------|----------------|
| 118 | 10PRO   | H    | 0.046892         | 0.000000       | 322 | 27HIE   | C    | -0.058180        | -0.001485      |
| 119 | 11HIE   | N    | -0.152539        | 0.000134       | 323 | 27HIE   | N    | -0.322293        | 0.038404       |
| 120 | 11HIE   | C    | 0.077532         | -0.000282      | 324 | 27HIE   | C    | 0.017203         | 0.001009       |
| 121 | 11HIE   | C    | 0.204809         | 0.003105       | 325 | 27HIE   | C    | 0.226399         | -0.001145      |
| 122 | 11HIE   | O    | -0.491847        | 0.027316       | 326 | 27HIE   | N    | -0.118937        | 0.001756       |
| 123 | 11HIE   | H    | 0.150934         | -0.000023      | 327 | 27HIE   | H    | 0.057112         | 0.000163       |
| 124 | 11HIE   | H    | 0.039380         | -0.000146      | 328 | 27HIE   | H    | 0.060102         | -0.000171      |
| 125 | 11HIE   | C    | 0.027512         | 0.000883       | 329 | 27HIE   | H    | 0.018615         | 0.000117       |
| 126 | 11HIE   | C    | -0.019531        | -0.000314      | 330 | 27HIE   | H    | 0.032978         | 0.000309       |
| 127 | 11HIE   | N    | -0.353471        | 0.034365       | 331 | 27HIE   | H    | 0.234229         | 0.000459       |
| 128 | 11HIE   | C    | 0.029061         | -0.000390      | 332 | 28GLY   | N    | -0.419263        | 0.172076       |
| 129 | 11HIE   | C    | 0.221630         | 0.000777       | 333 | 28GLY   | C    | 0.182602         | -0.001677      |
| 130 | 11HIE   | N    | -0.156119        | 0.003569       | 334 | 28GLY   | C    | 0.226222         | -0.003185      |
| 131 | 11HIE   | H    | 0.030166         | -0.000135      | 335 | 28GLY   | O    | -0.485253        | 0.006437       |
| 132 | 11HIE   | H    | 0.059963         | -0.000100      | 336 | 28GLY   | H    | 0.069569         | 0.000353       |
| 133 | 11HIE   | H    | 0.031725         | 0.000169       | 337 | 28GLY   | H    | 0.051709         | 0.002708       |
| 134 | 11HIE   | H    | 0.142740         | 0.001084       | 338 | 29GLY   | N    | -0.462777        | 0.146489       |
| 135 | 11HIE   | H    | 0.265296         | 0.000331       | 339 | 29GLY   | C    | 0.154194         | 0.002552       |
| 136 | 12GLY   | N    | -0.488121        | 0.141173       | 340 | 29GLY   | C    | 0.232923         | 0.002971       |
| 137 | 12GLY   | C    | 0.173519         | -0.002120      | 341 | 29GLY   | O    | -0.334225        | 0.026459       |
| 138 | 12GLY   | C    | 0.185143         | -0.003463      | 342 | 29GLY   | H    | 0.101475         | 0.002564       |
| 139 | 12GLY   | O    | -0.377000        | 0.006590       | 343 | 29GLY   | H    | 0.045479         | 0.003040       |
| 140 | 12GLY   | H    | 0.057038         | 0.000688       | 344 | 30GLY   | N    | -0.250372        | 0.000162       |
| 141 | 12GLY   | H    | 0.050757         | 0.000627       | 345 | 30GLY   | C    | 0.106970         | -0.000014      |
| 142 | 13GLY   | N    | -0.503279        | 0.142749       | 346 | 30GLY   | C    | 0.138401         | -0.000004      |
| 143 | 13GLY   | C    | 0.115645         | -0.000340      | 347 | 30GLY   | O    | -0.309989        | 0.000187       |
| 144 | 13GLY   | C    | 0.155216         | 0.002363       | 348 | 30GLY   | H    | 0.211047         | 0.000496       |
| 145 | 13GLY   | O    | -0.341726        | 0.019723       | 349 | 30GLY   | H    | 0.054447         | 0.000022       |
| 146 | 13GLY   | H    | 0.082891         | 0.000058       | 350 | 30GLY   | H    | 0.096502         | 0.000039       |
| 147 | 13GLY   | H    | 0.080439         | 0.007950       | 351 | 31TRP   | N    | -0.171460        | -0.000022      |
| 148 | 14GLY   | N    | -0.250230        | 0.001750       | 352 | 31TRP   | C    | 0.027053         | -0.000032      |
| 149 | 14GLY   | C    | 0.148376         | -0.000194      | 353 | 31TRP   | C    | 0.139262         | 0.000003       |
| 150 | 14GLY   | C    | 0.185181         | 0.000042       | 354 | 31TRP   | O    | -0.358143        | 0.000001       |
| 151 | 14GLY   | O    | -0.396708        | 0.000040       | 355 | 31TRP   | H    | 0.142044         | -0.000002      |
| 152 | 14GLY   | H    | 0.229853         | 0.000436       | 356 | 31TRP   | H    | 0.045968         | 0.000028       |
| 153 | 14GLY   | H    | 0.042637         | 0.000092       | 357 | 31TRP   | C    | 0.087655         | 0.000006       |
| 154 | 14GLY   | H    | 0.100911         | 0.000138       | 358 | 31TRP   | C    | -0.128416        | -0.000029      |
| 155 | 15TRP   | N    | -0.249763        | -0.000006      | 359 | 31TRP   | C    | -0.023071        | -0.000024      |
| 156 | 15TRP   | C    | 0.069792         | 0.000000       | 360 | 31TRP   | C    | 0.037233         | -0.000066      |
| 157 | 15TRP   | C    | 0.150680         | -0.000001      | 361 | 31TRP   | N    | -0.132537        | 0.000016       |
| 158 | 15TRP   | O    | -0.364371        | 0.000000       | 362 | 31TRP   | C    | 0.069629         | -0.000157      |
| 159 | 15TRP   | H    | 0.192420         | 0.000013       | 363 | 31TRP   | C    | -0.045362        | 0.000041       |
| 160 | 15TRP   | H    | 0.066264         | 0.000000       | 364 | 31TRP   | C    | -0.045591        | -0.000101      |
| 161 | 15TRP   | C    | 0.050270         | 0.000001       | 365 | 31TRP   | C    | -0.043831        | 0.000151       |
| 162 | 15TRP   | C    | -0.118254        | 0.000000       | 366 | 31TRP   | C    | -0.057869        | -0.000091      |
| 163 | 15TRP   | C    | 0.013129         | 0.000000       | 367 | 31TRP   | H    | 0.019770         | -0.000001      |
| 164 | 15TRP   | C    | 0.016509         | -0.000001      | 368 | 31TRP   | H    | 0.072032         | 0.000000       |
| 165 | 15TRP   | N    | -0.118900        | 0.000000       | 369 | 31TRP   | H    | 0.067849         | 0.000001       |

Table S1: Mulliken charges and spin densities for model 1.

| No. | Residue | Atom | Mulliken charges | Spin densities | No. | Residue | Atom | Mulliken charges | Spin densities |
|-----|---------|------|------------------|----------------|-----|---------|------|------------------|----------------|
| 166 | 15TRP   | C    | 0.053931         | 0.000000       | 370 | 31TRP   | H    | 0.188019         | -0.000001      |
| 167 | 15TRP   | C    | -0.132455        | 0.000007       | 371 | 31TRP   | H    | -0.009480        | 0.000005       |
| 168 | 15TRP   | C    | -0.089909        | 0.000000       | 372 | 31TRP   | H    | 0.027326         | -0.000004      |
| 169 | 15TRP   | C    | -0.067127        | 0.000000       | 373 | 31TRP   | H    | 0.018586         | -0.000018      |
| 170 | 15TRP   | C    | -0.023041        | 0.000000       | 374 | 31TRP   | H    | 0.027778         | -0.000002      |
| 171 | 15TRP   | H    | 0.034750         | 0.000000       | 375 | 32GLY   | N    | -0.245057        | -0.000001      |
| 172 | 15TRP   | H    | 0.047404         | -0.000001      | 376 | 32GLY   | C    | 0.096464         | 0.000000       |
| 173 | 15TRP   | H    | 0.066176         | 0.000000       | 377 | 32GLY   | C    | 0.154802         | 0.000000       |
| 174 | 15TRP   | H    | 0.161296         | 0.000000       | 378 | 32GLY   | O    | -0.345839        | 0.000000       |
| 175 | 15TRP   | H    | 0.048716         | 0.000007       | 379 | 32GLY   | H    | 0.174450         | 0.000000       |
| 176 | 15TRP   | H    | 0.044294         | 0.000000       | 380 | 32GLY   | H    | 0.110875         | 0.000000       |
| 177 | 15TRP   | H    | 0.044714         | 0.000000       | 381 | 32GLY   | H    | 0.110888         | 0.000000       |
| 178 | 15TRP   | H    | 0.042844         | 0.000000       | 382 | 33GLN   | N    | -0.257748        | 0.000001       |
| 179 | 16GLY   | N    | -0.171719        | 0.000003       | 383 | 33GLN   | C    | -0.021219        | -0.000002      |
| 180 | 16GLY   | C    | 0.076653         | -0.000002      | 384 | 33GLN   | C    | 0.235833         | -0.000001      |
| 181 | 16GLY   | C    | 0.193841         | -0.000001      | 385 | 33GLN   | O    | -0.420748        | 0.000001       |
| 182 | 16GLY   | O    | -0.370295        | 0.000000       | 386 | 33GLN   | H    | 0.185105         | -0.000004      |
| 183 | 16GLY   | H    | 0.181416         | -0.000008      | 387 | 33GLN   | H    | 0.107826         | 0.000002       |
| 184 | 16GLY   | H    | 0.128808         | 0.000000       | 388 | 33GLN   | C    | -0.039096        | 0.000030       |
| 185 | 16GLY   | H    | 0.076163         | -0.000003      | 389 | 33GLN   | C    | -0.094488        | -0.000023      |
| 186 | 17GLN   | N    | -0.271328        | 0.000001       | 390 | 33GLN   | C    | 0.113638         | -0.000030      |
| 187 | 17GLN   | C    | 0.021222         | 0.000001       | 391 | 33GLN   | O    | -0.417666        | 0.000045       |
| 188 | 17GLN   | C    | 0.276823         | -0.000006      | 392 | 33GLN   | N    | -0.176901        | -0.000021      |
| 189 | 17GLN   | O    | -0.429240        | 0.000001       | 393 | 33GLN   | H    | 0.078070         | -0.000043      |
| 190 | 17GLN   | H    | 0.209642         | 0.000000       | 394 | 33GLN   | H    | 0.057471         | -0.000003      |
| 191 | 17GLN   | H    | 0.091848         | -0.000002      | 395 | 33GLN   | H    | 0.024757         | -0.000007      |
| 192 | 17GLN   | C    | -0.093576        | 0.000000       | 396 | 33GLN   | H    | 0.078856         | -0.000515      |
| 193 | 17GLN   | C    | -0.045267        | 0.000000       | 397 | 33GLN   | H    | 0.171421         | -0.000087      |
| 194 | 17GLN   | C    | 0.092827         | 0.000000       | 398 | 33GLN   | H    | 0.204547         | 0.000002       |
| 195 | 17GLN   | O    | -0.361612        | 0.000000       | 399 | 34NME   | N    | -0.268801        | -0.000001      |
| 196 | 17GLN   | N    | -0.127504        | 0.000000       | 400 | 34NME   | C    | -0.010078        | 0.000000       |
| 197 | 17GLN   | H    | 0.083585         | 0.000000       | 401 | 34NME   | H    | 0.198036         | 0.000000       |
| 198 | 17GLN   | H    | 0.085893         | 0.000000       | 402 | 34NME   | H    | 0.056095         | 0.000000       |
| 199 | 17GLN   | H    | 0.089916         | 0.000000       | 403 | 34NME   | H    | 0.070927         | 0.000000       |
| 200 | 17GLN   | H    | -0.006308        | 0.000000       | 404 | 34NME   | H    | 0.071640         | 0.000000       |
| 201 | 17GLN   | H    | 0.191964         | 0.000000       | 405 | ION     | Cu   | 0.720523         | 0.642707       |
| 202 | 17GLN   | H    | 0.185827         | 0.000000       | 406 | ION     | Cu   | 0.653674         | 0.611802       |
| 203 | 18PRO   | N    | -0.300000        | -0.000001      | 407 | ION     | Cu   | 0.658903         | 0.619523       |
| 204 | 18PRO   | C    | 0.007029         | 0.000002       | 408 | ION     | Cu   | 0.624577         | 0.586097       |

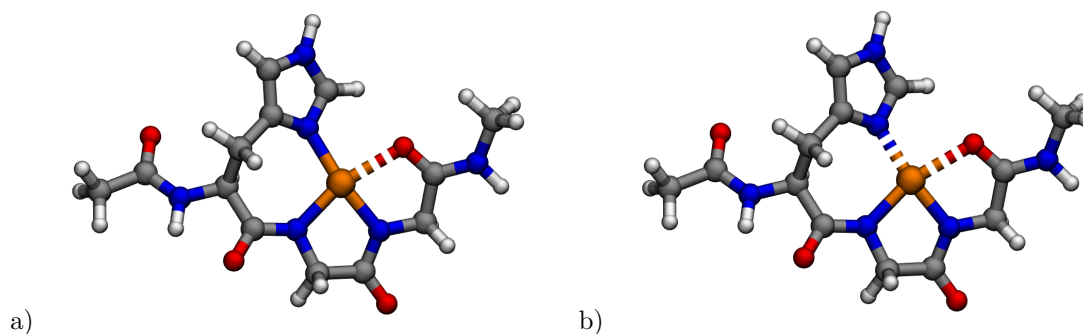

Figure S2: Models used for parameterization. The dashed bond represents that only non-bonding interactions are taking into account for that interaction. a) Model 1 includes binding interactions between the copper ion and deprotonated nitrogens of glycines as well as the nitrogen atom of the imidazole ring of histidine. b) Model 2 considers only bonding interactions between the copper ion and deprotonated nitrogen atoms.

Table S2: Core (C) and valance (V) basin populations in the fragment defined by His-Gly-Gly (HGG) residues and in the first coordination sphere (FCS).

| Basin    | HGG   | FCS   |
|----------|-------|-------|
| C(N1)    | 2.06  | 2.07  |
| C(N2)    | 2.05  | 2.04  |
| C(N3)    | 2.06  | 2.04  |
| C(Cu)    | 26.83 | 26.76 |
| V(N1,Cu) | 3.64  | 5.68  |
| V(N2,Cu) | 3.84  | 5.94  |
| V(N3,Cu) | 3.24  | 5.08  |

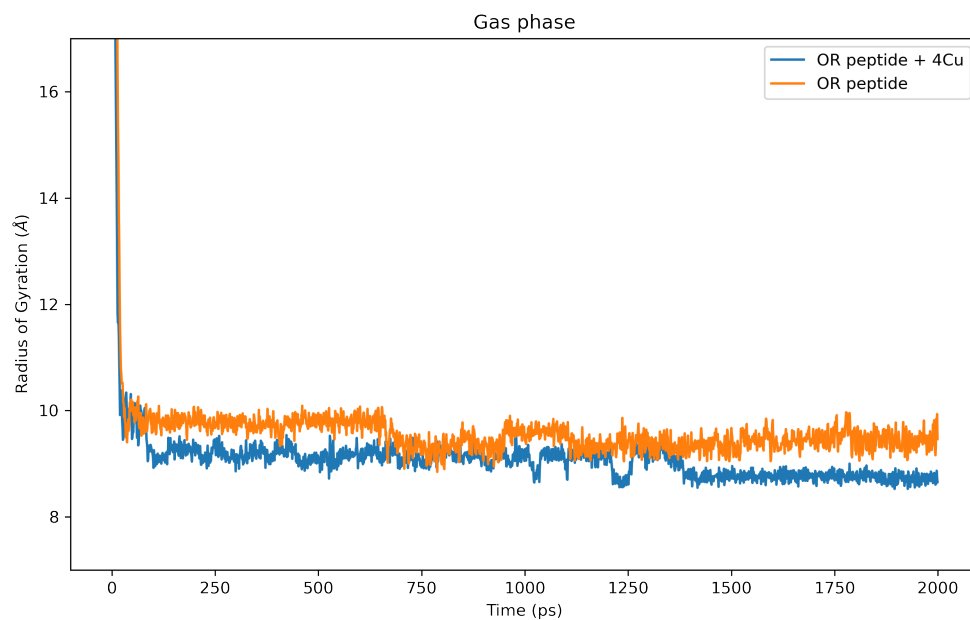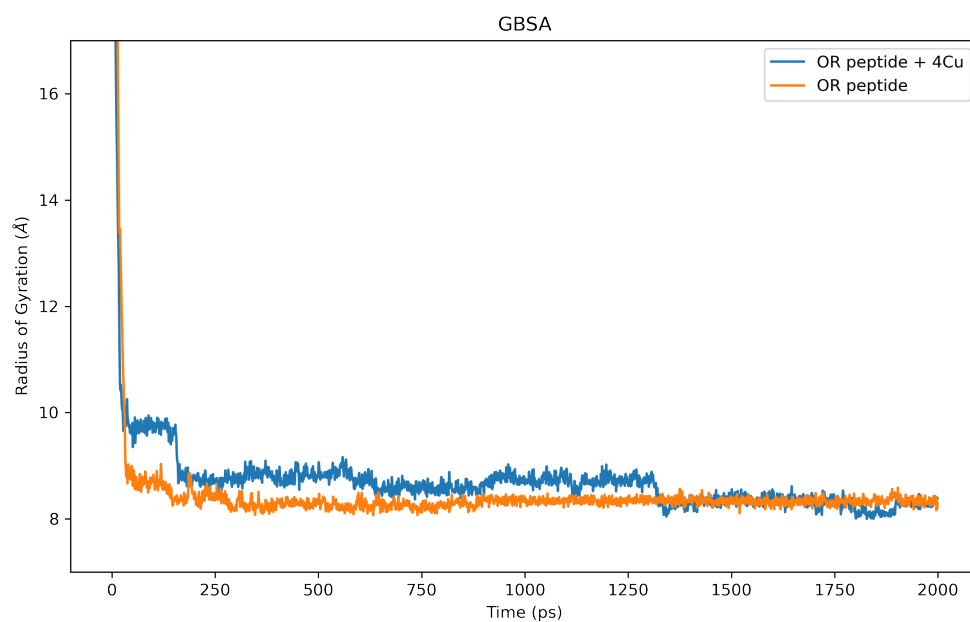

Figure S3: Radius of gyration of the OR region with and without copper ions in gas phase (above) and with solvent implicit (bottom). The graph shows how in the first picoseconds of simulation the peptide changes from an extended structure to a compact structure regardless of whether it contains copper ions or not.

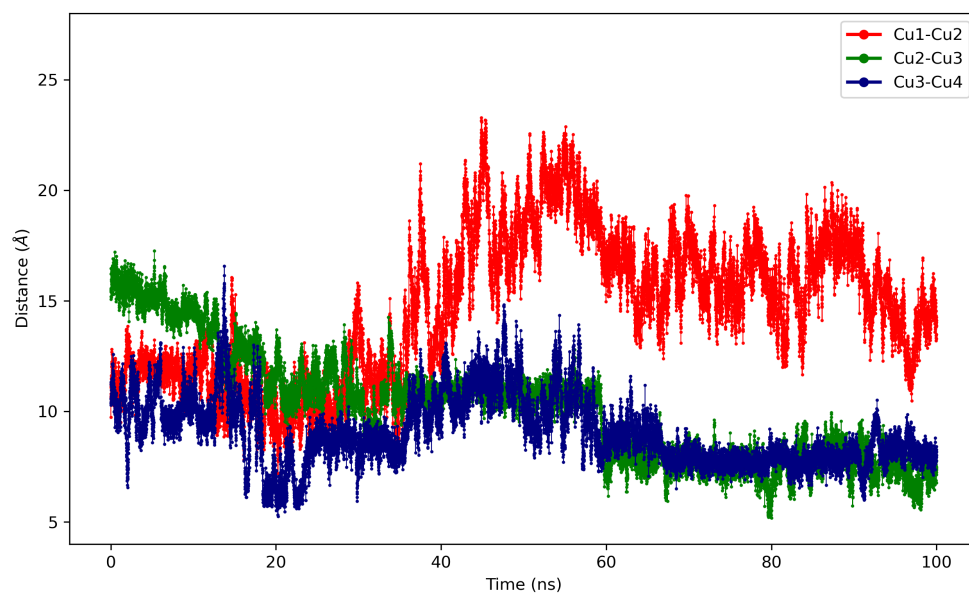

Figure S4: Distances between nearby copper ions in model 1. The distance between the Cu1 and Cu2 ions ranges from 7.2 to 23.3 Å and average of 14.63 Å. The distance between the Cu2 and Cu3 ions ranges from 5.1 to 17.3 and average of 10.18 Å. The distance between the Cu3 and Cu4 ions ranges from 5.2 to 16.6 Å and average of 9.03 Å.

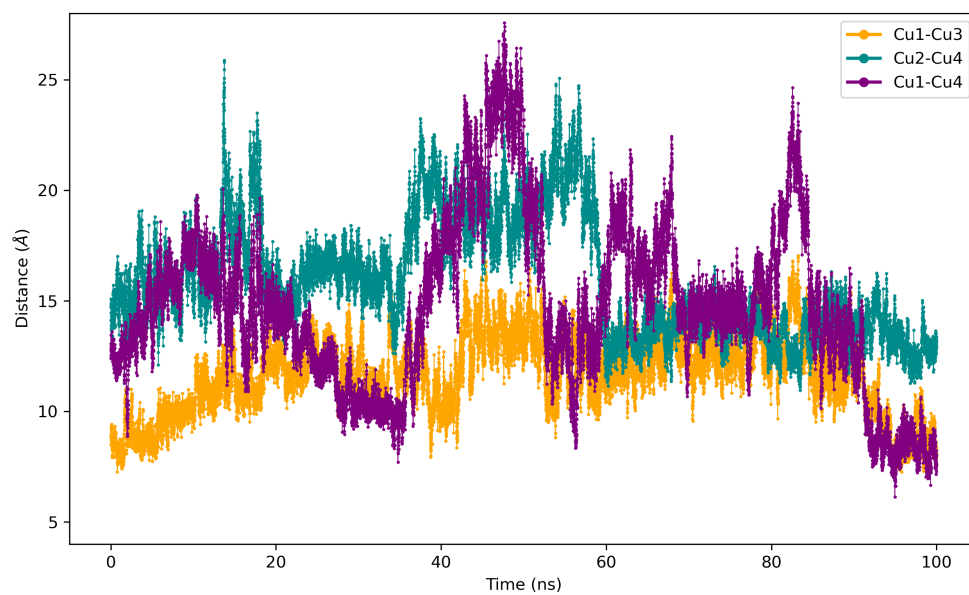

Figure S5: Distances between distant copper ions in model 1. The distance between the Cu1 and Cu3 ions ranges from 6.9 to 17.1 Å and average of 11.64 Å. The distance between the Cu2 and Cu4 ions ranges from 10.9 to 25.9 Å and average of 15.96 Å. The distance between the Cu1 and Cu4 ions ranges from 6.1 to 27.6 Å and average of 14.70 Å.

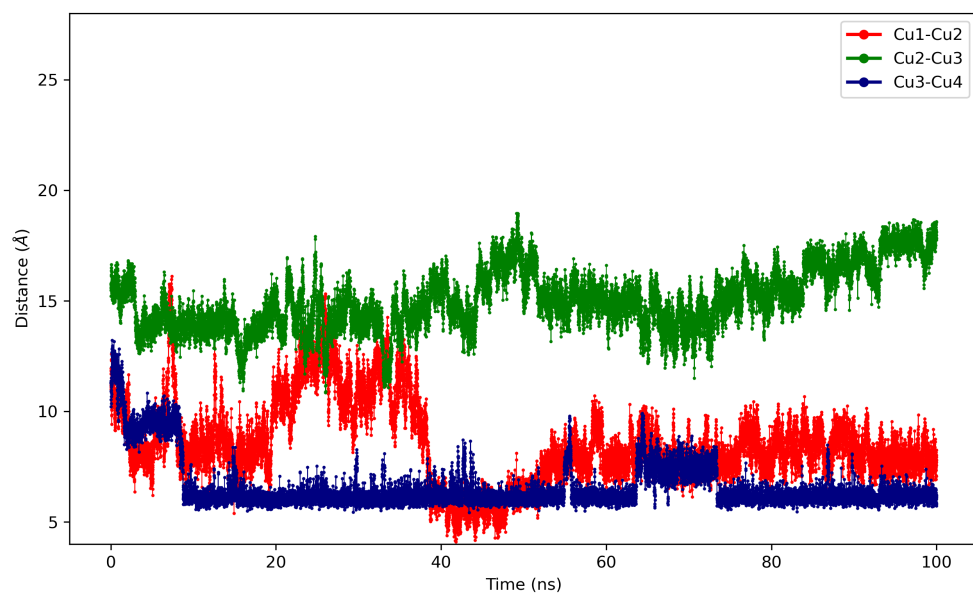

Figure S6: Distances between nearby copper ions in model 2. The distance between the Cu1 and Cu2 ions ranges from 4.1 to 16.1 Å and average of 8.53 Å. The distance between the Cu2 and Cu3 ions ranges from 10.8 to 19.0 and average of 15.05 Å. The distance between the Cu3 and Cu4 ions ranges from 5.4 to 13.2 Å and average of 6.61 Å.

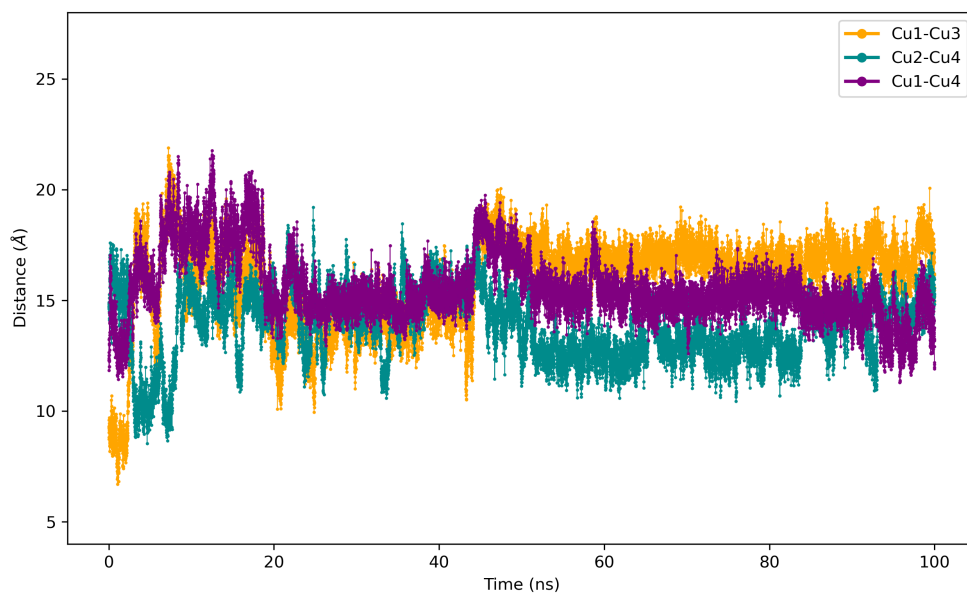

Figure S7: Distances between distant copper ions in model 2. The distance between the Cu1 and Cu3 ions ranges from 6.7 to 21.9 Å and average of 15.93 Å. The distance between the Cu2 and Cu4 ions ranges from 8.5 to 19.2 Å and average of 13.85 Å. The distance between the Cu1 and Cu4 ions ranges from 11.3 to 21.8 Å and average of 15.55 Å.

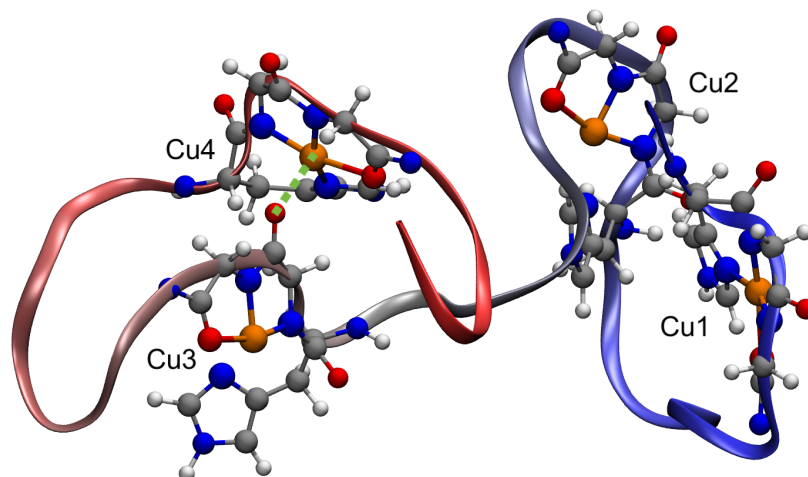

Figure S8: Structure of model 2 at 80 ns simulation where it is shown that the carbonyl oxygen of Cu3 is interacting with Cu4. The dotted green line represents this interaction.



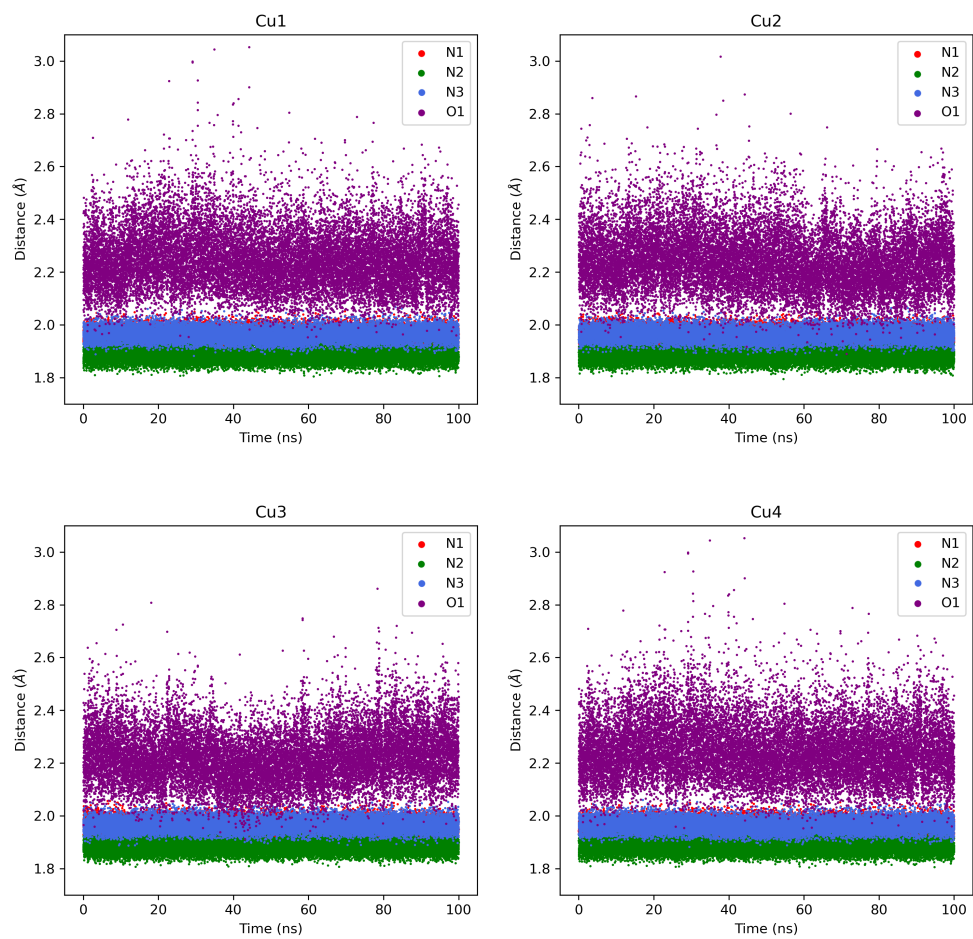

Figure S9: Bond distances of copper ions with their closest atoms in model 1 for each octapeptide. The labeling according to Fig. 4 has been used.

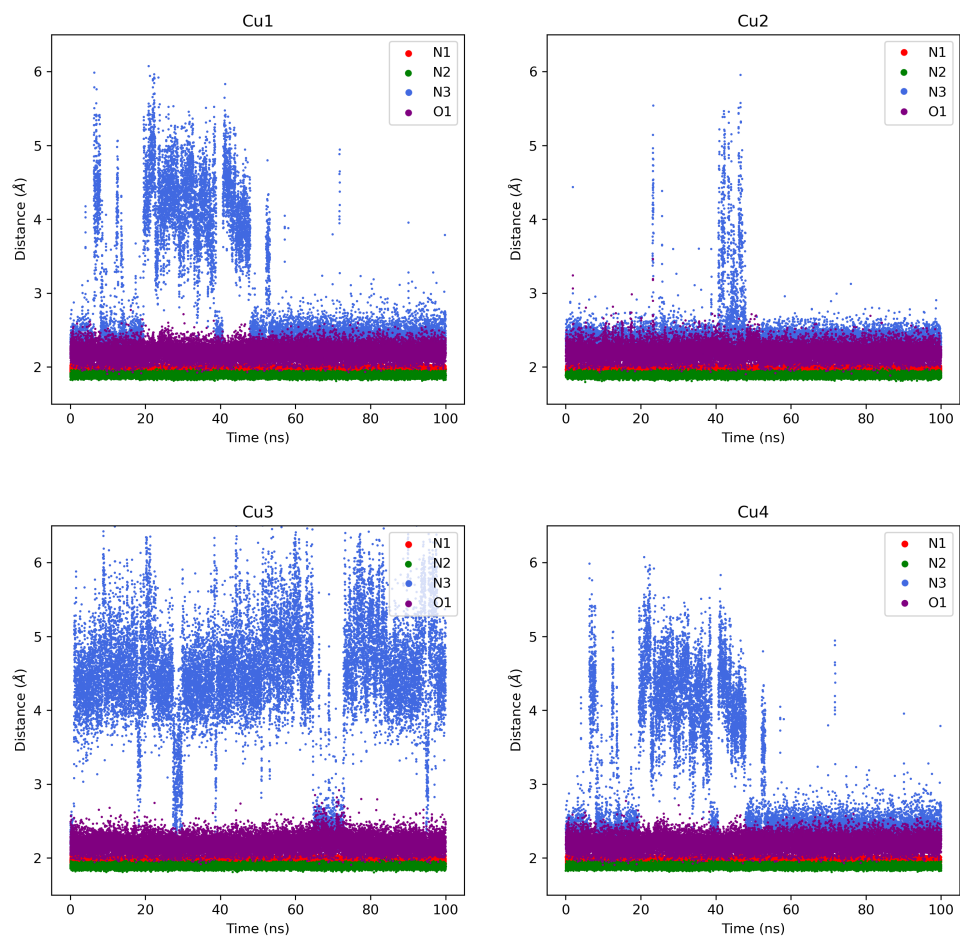

Figure S10: Bond distances of copper ions with their closest atoms in model 2 for each octapeptide. The labeling according to Fig. 4 has been used.

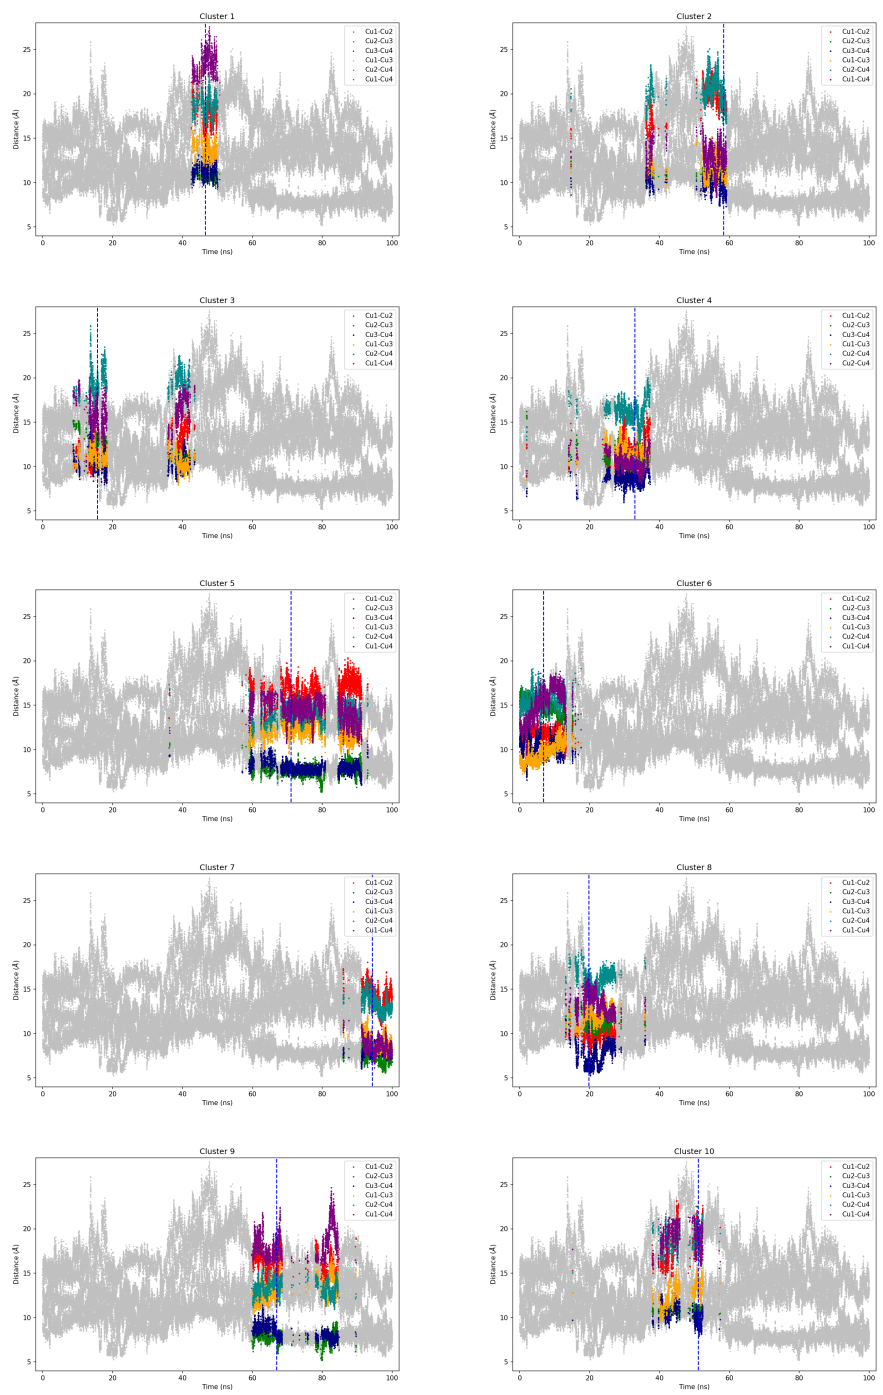

Figure S11: Clusters from the k-means analysis for model 1 (first run).

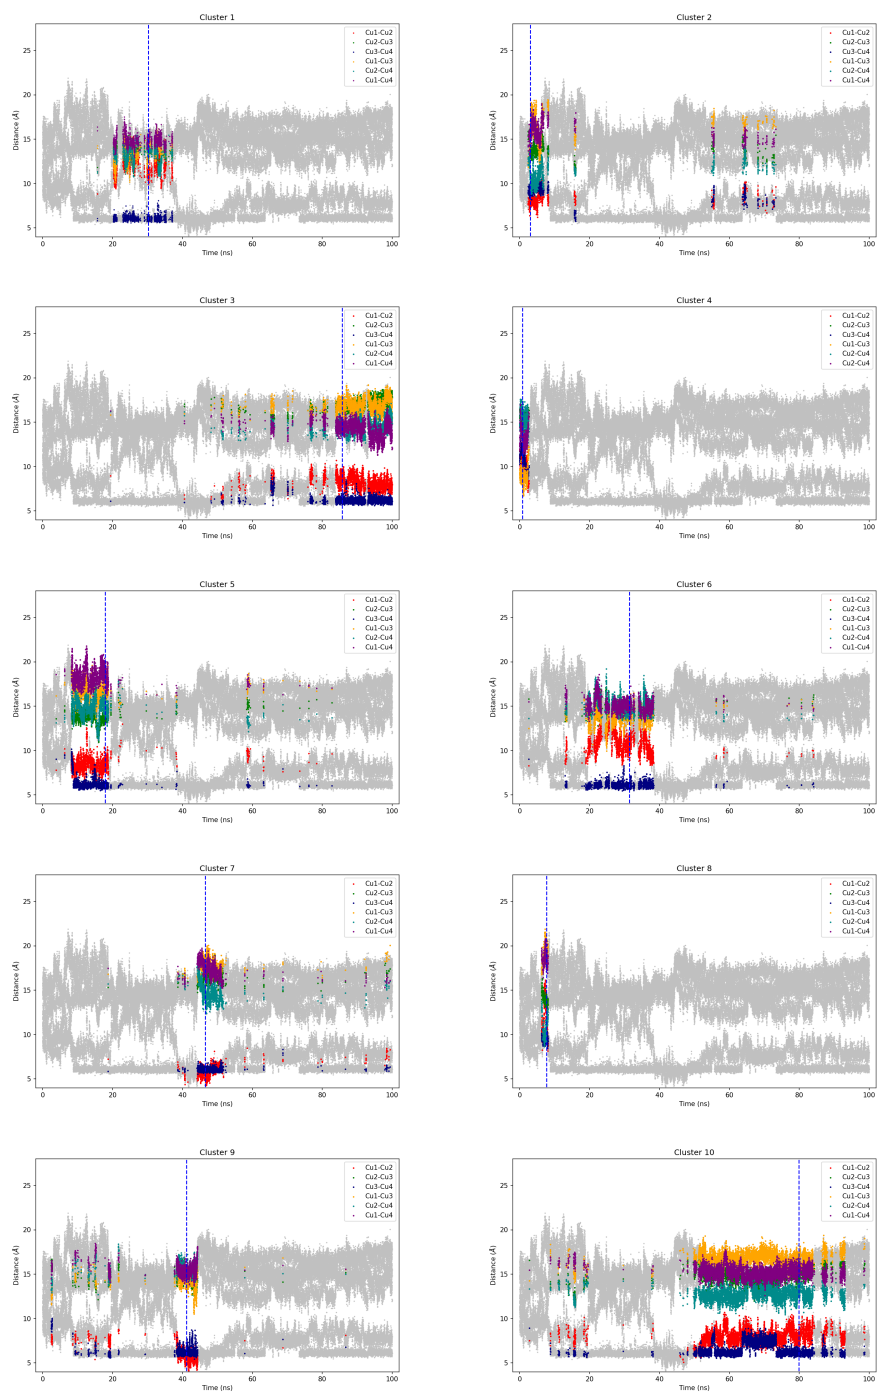

Figure S12: Clusters from the k-means analysis for model 2.

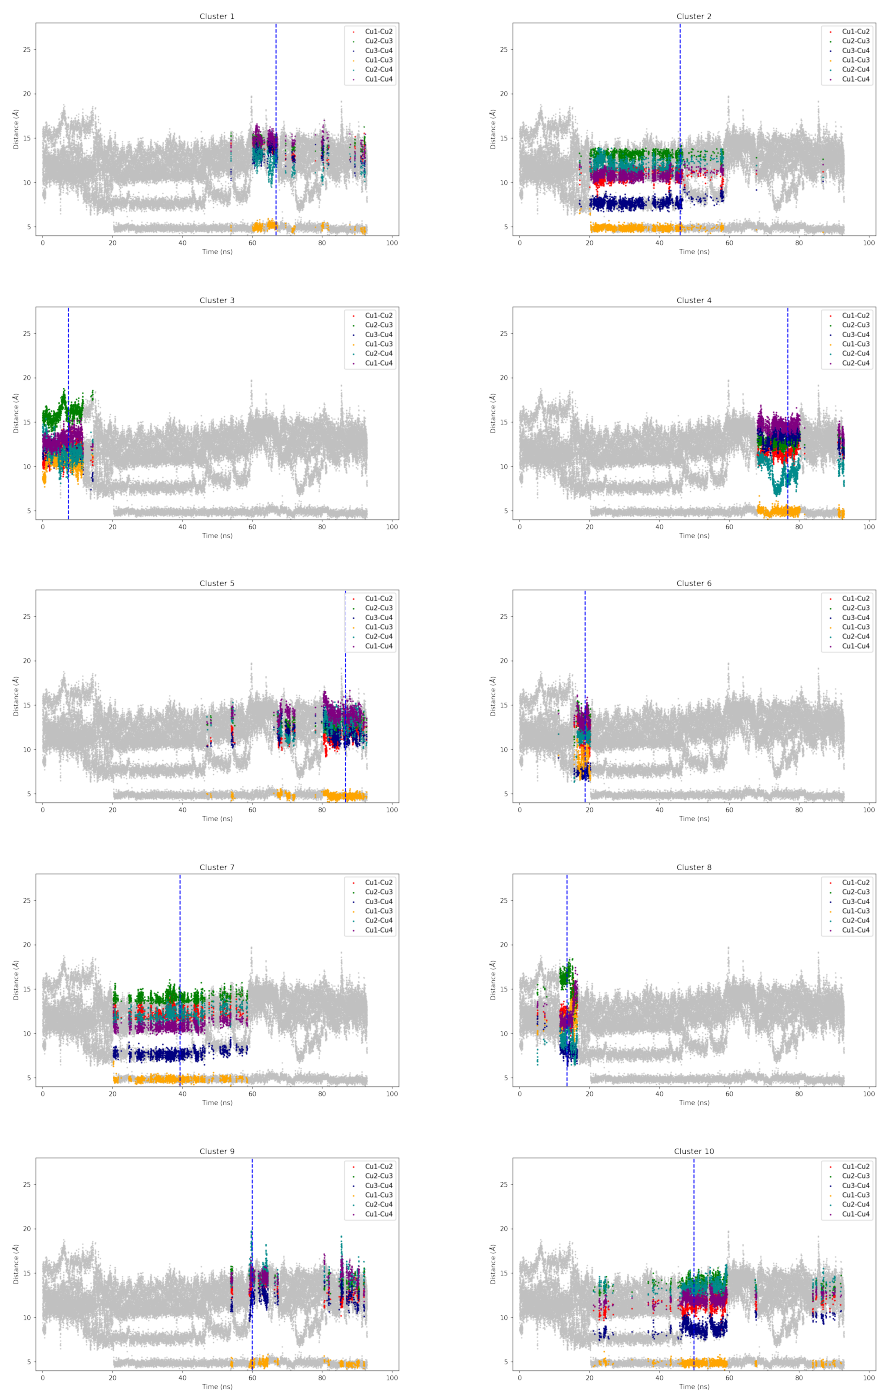

Figure S13: Clusters from the k-means analysis for model 1 (second run).

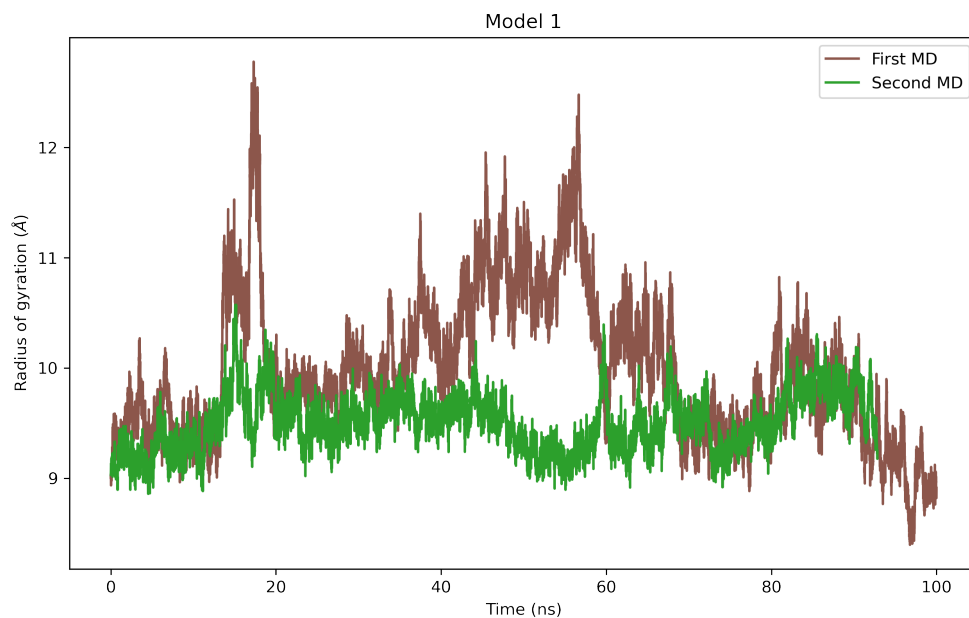

Figure S14: Radius of gyration between two different runs for model 1. In both MD simulations compact structures are obtained.

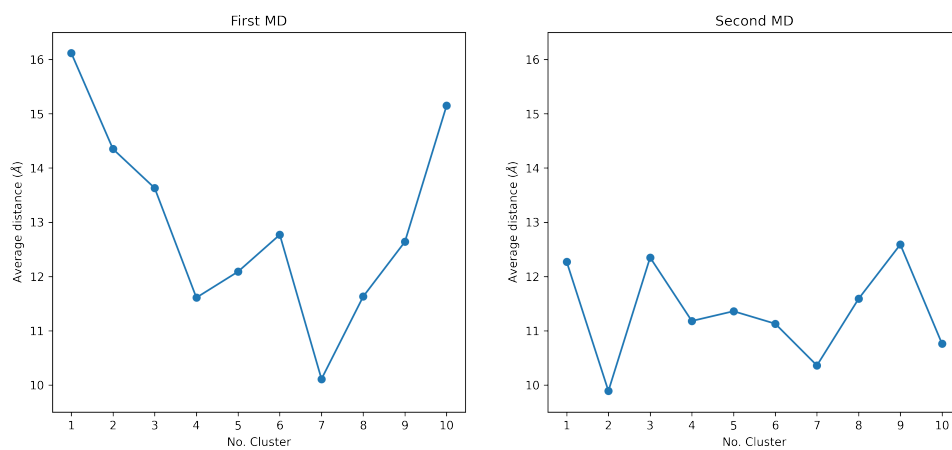

Figure S15: Average distances of the structures corresponding to centroids.

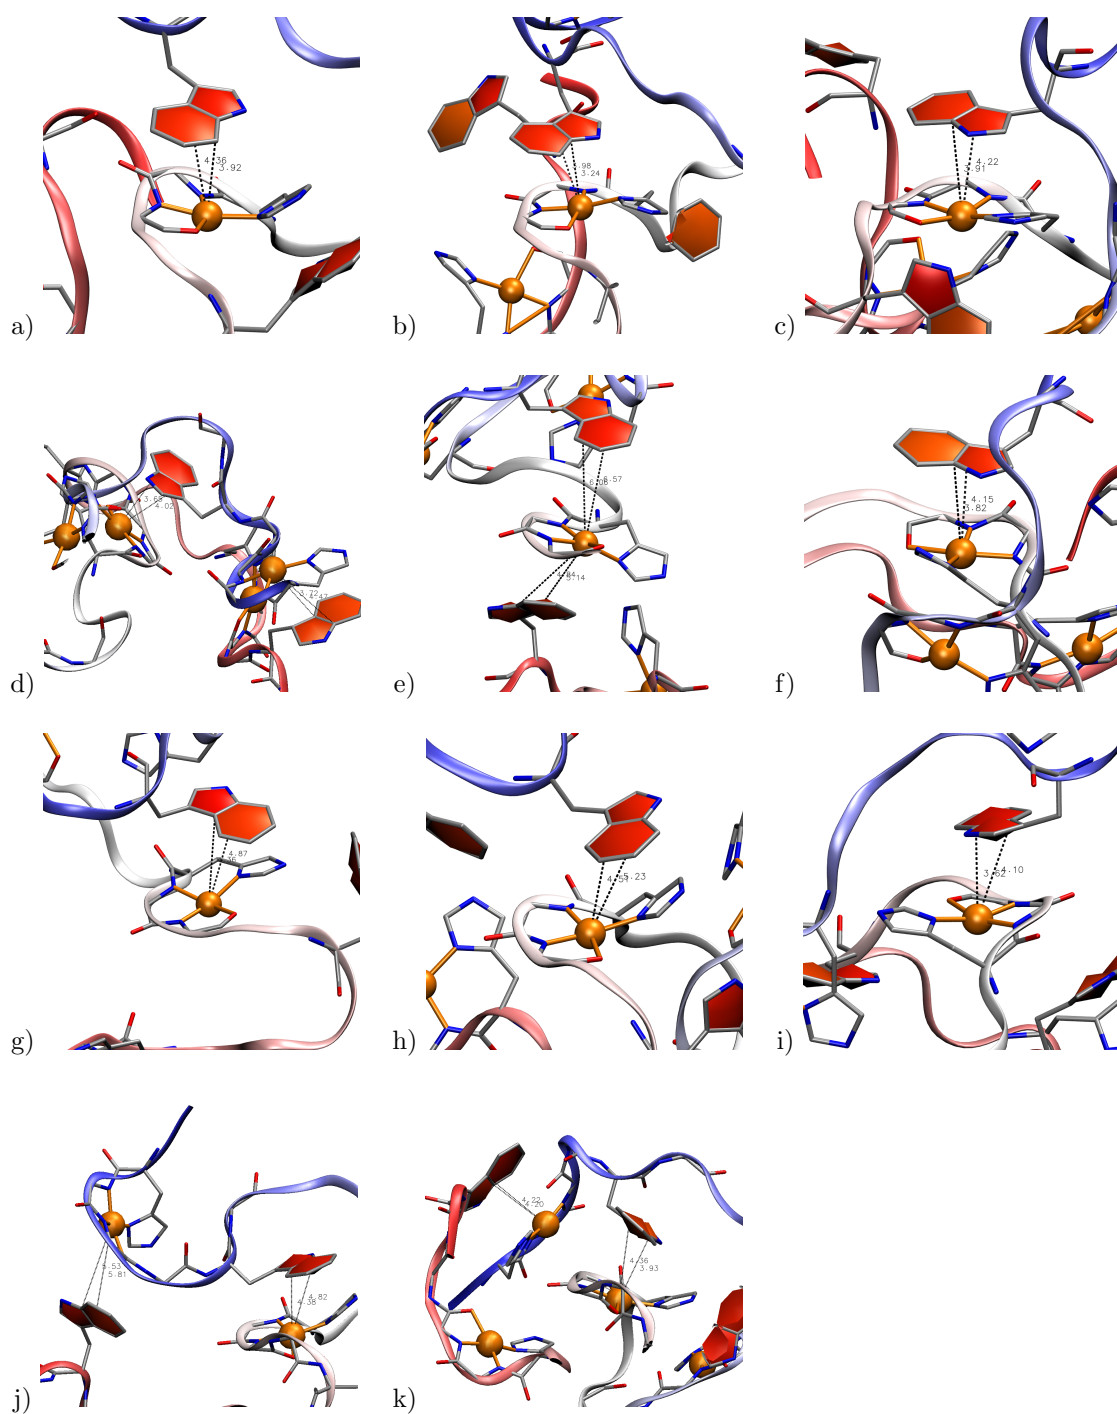

Figure S16: Close-up to show the copper-tryptophan interaction in each representative structure in model 1. The tryptophan has been represented with paper chains and all the hydrogens have been hidden for easy visualization. In all cases there is an interaction between copper 3 and the tryptophan of ORP 1. Note that in figure e) copper 3 also interacts with a tryptophan of ORP 4. In figures d), j) and k) the interaction between copper 1 and tryptophan of ORP 1 is also given.

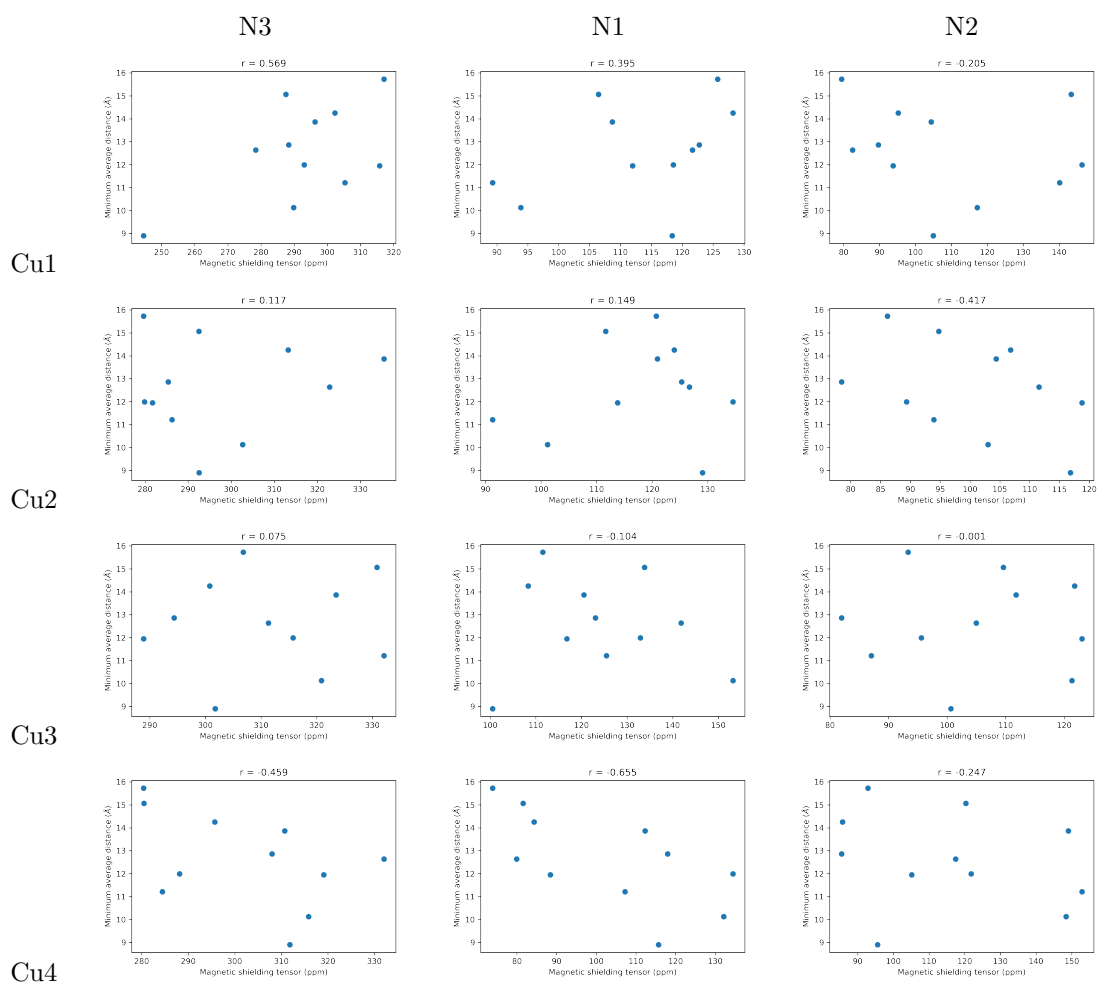

Figure S17: Comparison between chemical shifts and average bond distances for the 11 representative structures. The labeling in figure 6 has been used.



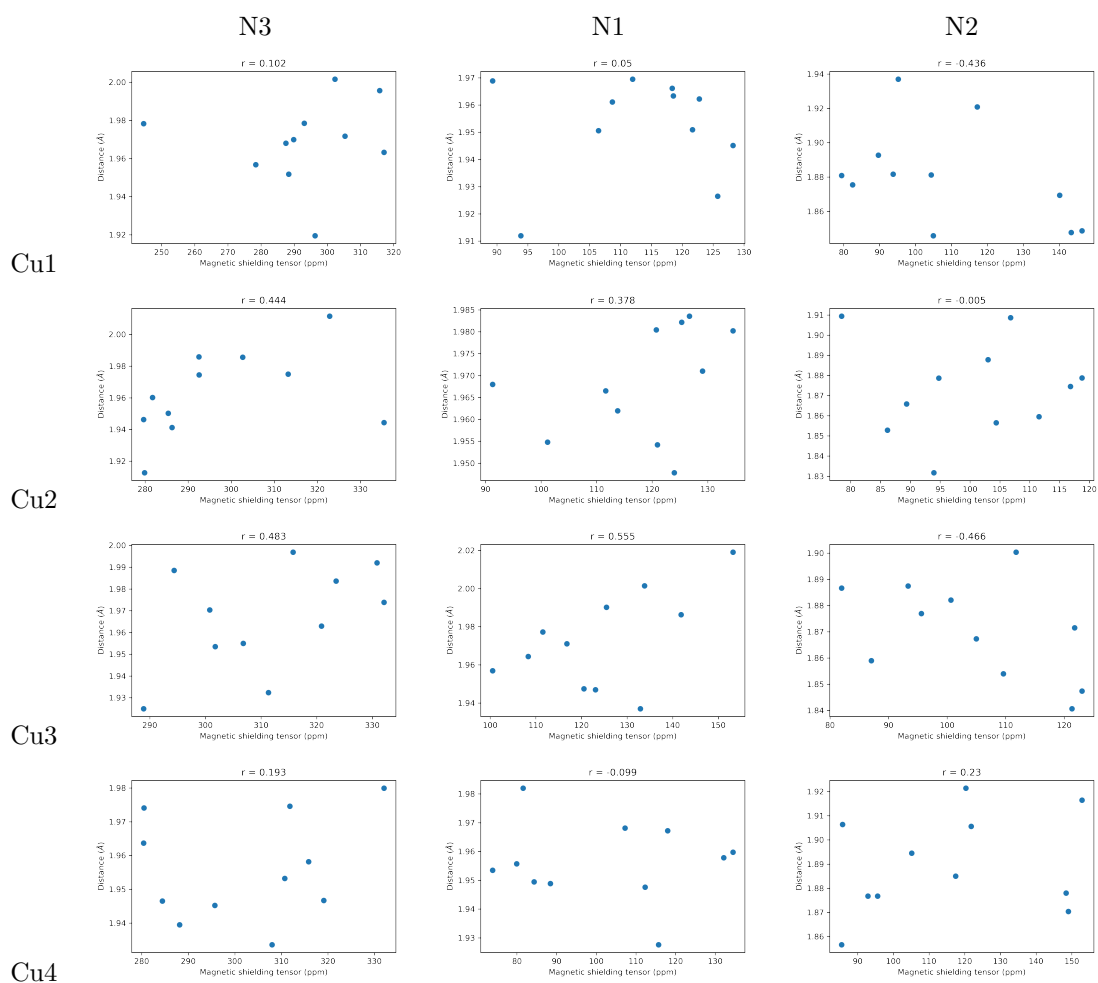

Figure S18: Comparison between chemical shifts and distances of the closest nitrogens to each copper ion for the 11 representative structures. The labeling in figure 6 has been used.

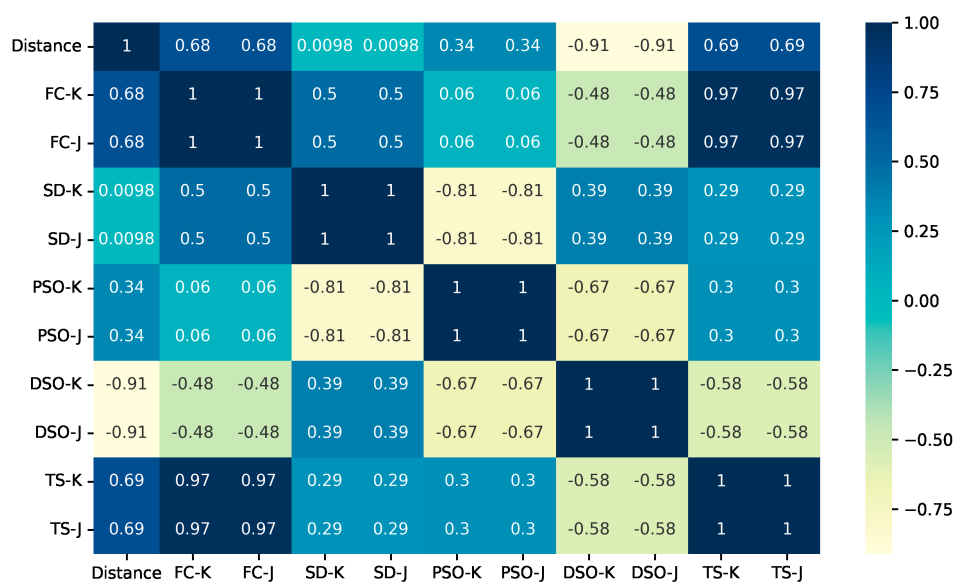

Figure S19: Correlation matrix of the NMR contributions.

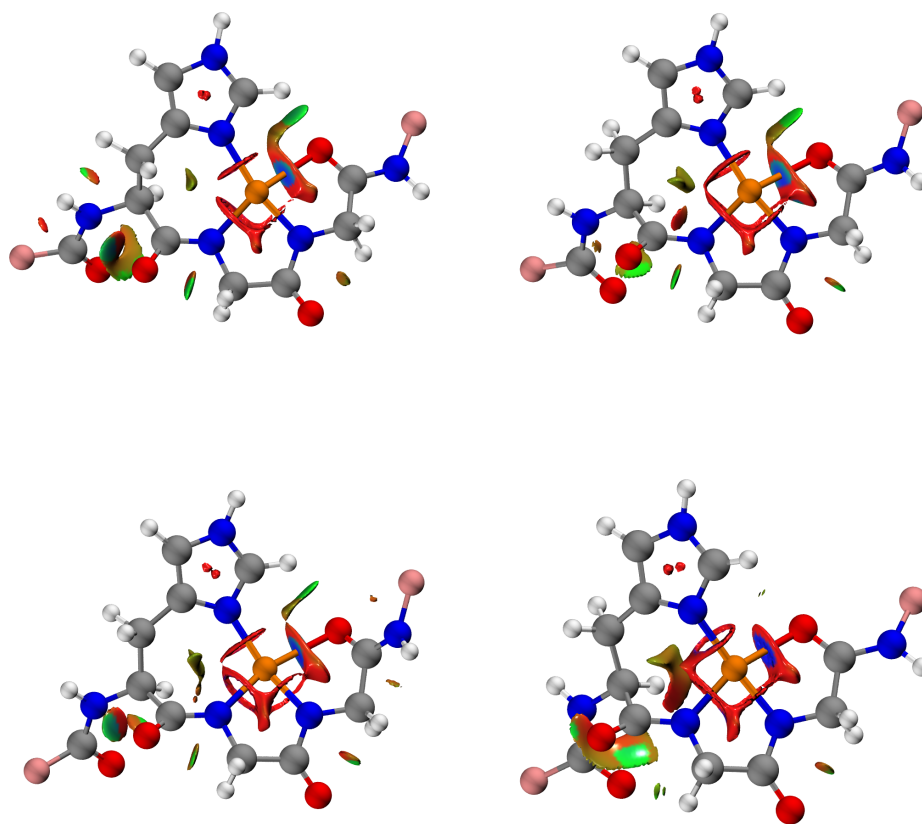

Figure S20: NCI plots for each of the coordination sites in the structure with the minimum average distances between copper ions. The isovalue is 0.6.

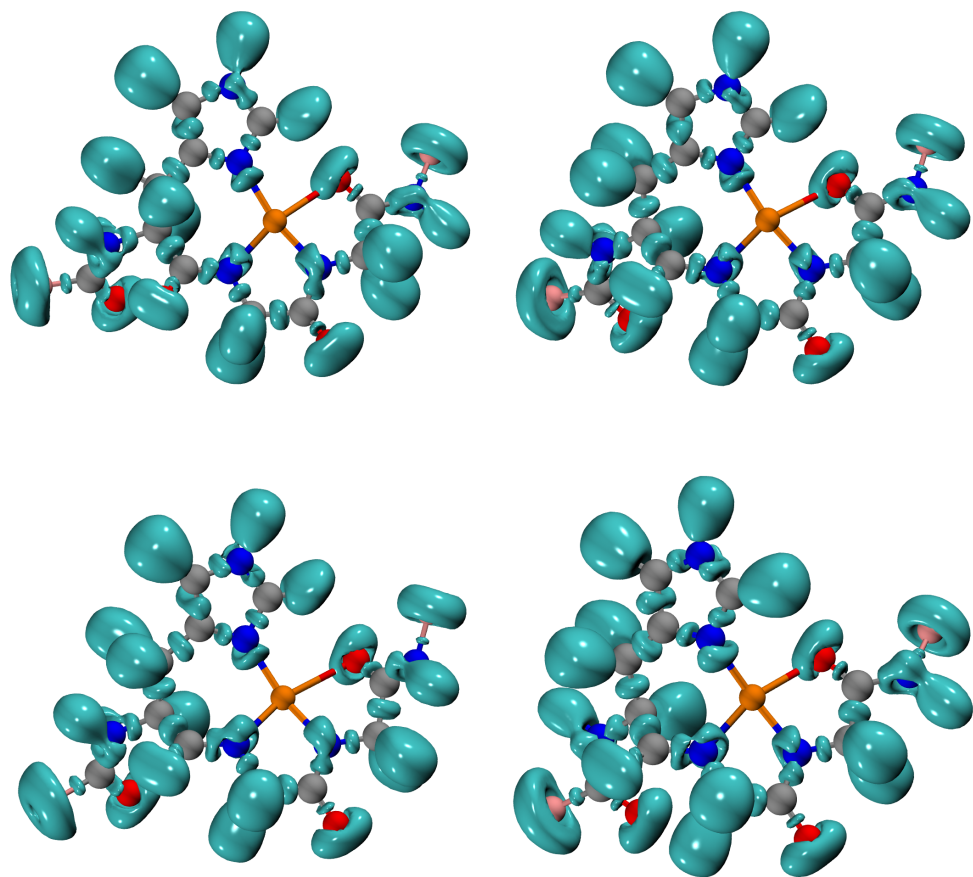

Figure S21: ELF plots for each of the coordination sites in the structure with the minimum average distances between copper ions. The isovalue is 0.82.
